# Supplementary material
Source: PubMed Central journal article supplement (PMC7545483)
Supplement: mmc1.pdf [file mmc1.pdf]

## Circulating Plasma Biomarkers of Survival in Antifibrotic-Treated Patients With Idiopathic Pulmonary Fibrosis

*Ayodeji Adegunsoye, MD; Shehabaldin Alqalyoobi, MD; Angela Linderholm, PhD;  
Willis S. Bowman, MD; Cathryn T. Lee, MD; Janelle Vu Pugashetti, MD; Nandini Sarma, MD;  
Shwu-Fan Ma, PhD; Angela Haczku, MD, PhD; Anne Sperling, PhD; Mary E. Streck, MD;  
Imre Noth, MD; and Justin M. Oldham, MD*

CHEST 2020; 158(4):1526-1534

*Online supplements are not copyedited prior to posting and the author(s) take full responsibility for the accuracy of all data.*

© 2020 AMERICAN COLLEGE OF CHEST PHYSICIANS. Reproduction of this article is prohibited without written permission from the American College of Chest Physicians. See online for more details. DOI: 10.1016/j.chest.2020.04.066

**e-Figure 1.** Scatterplot of plasma biomarker duplicates.  $R^2 > 0.99$  for each biomarker. |

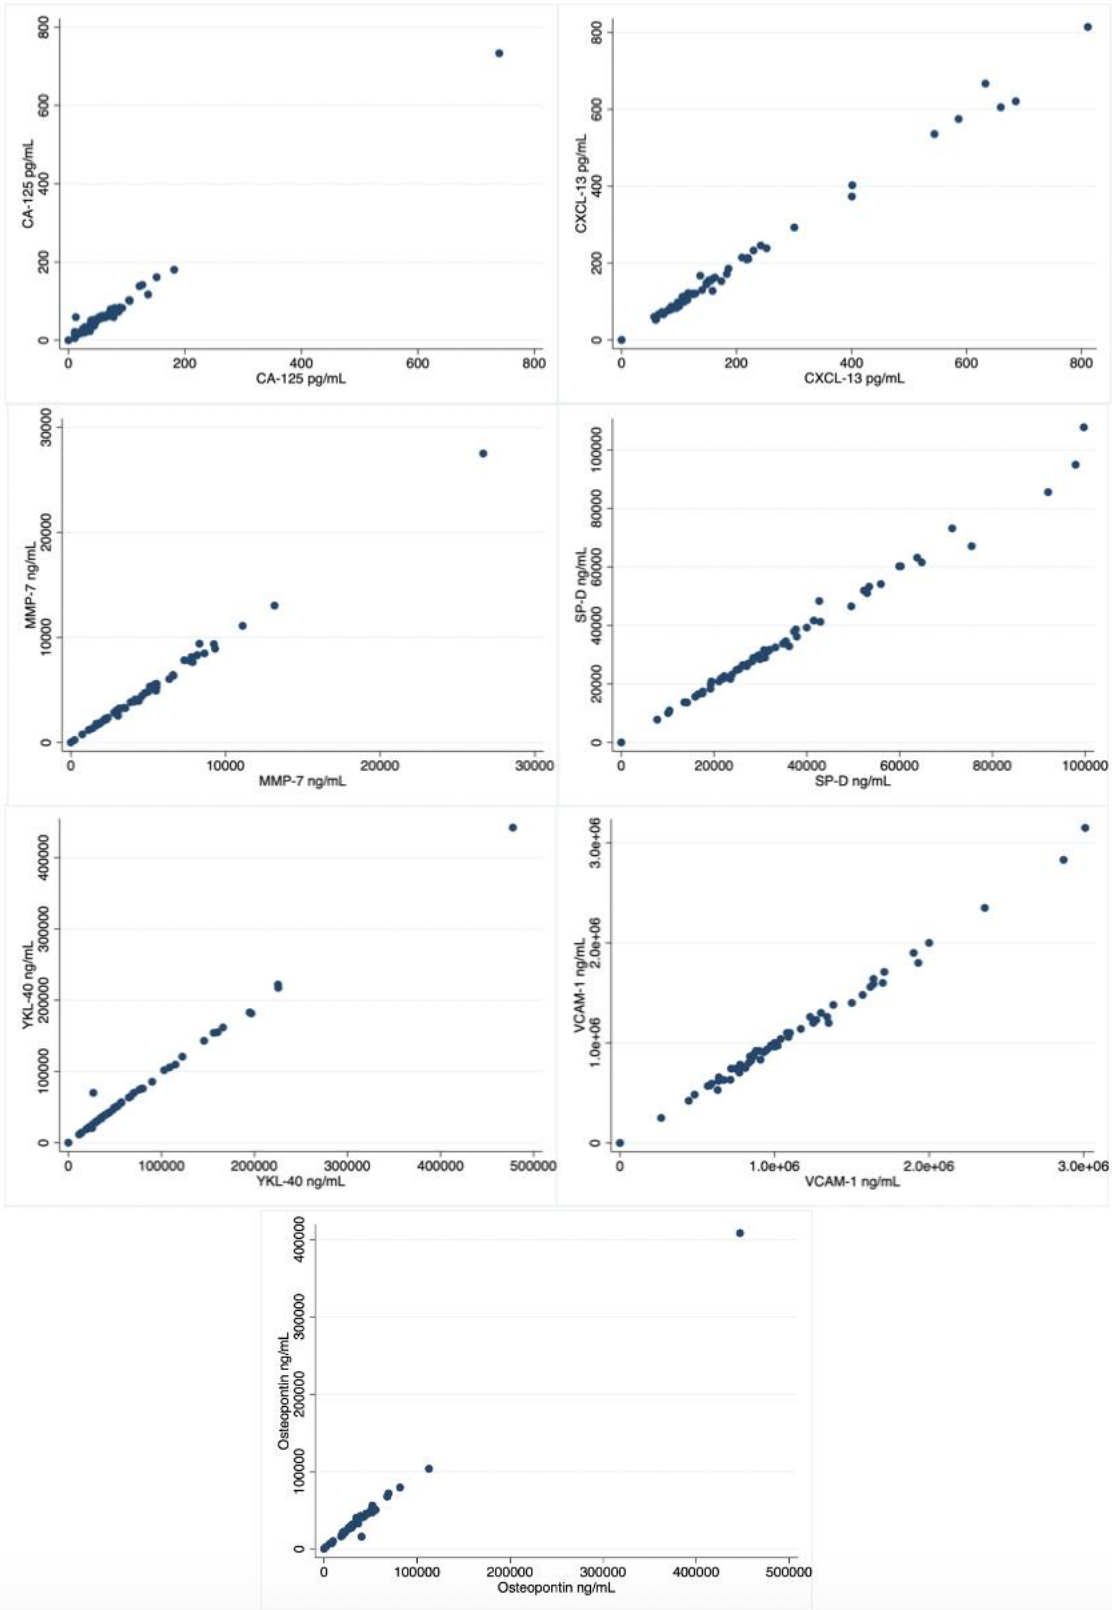

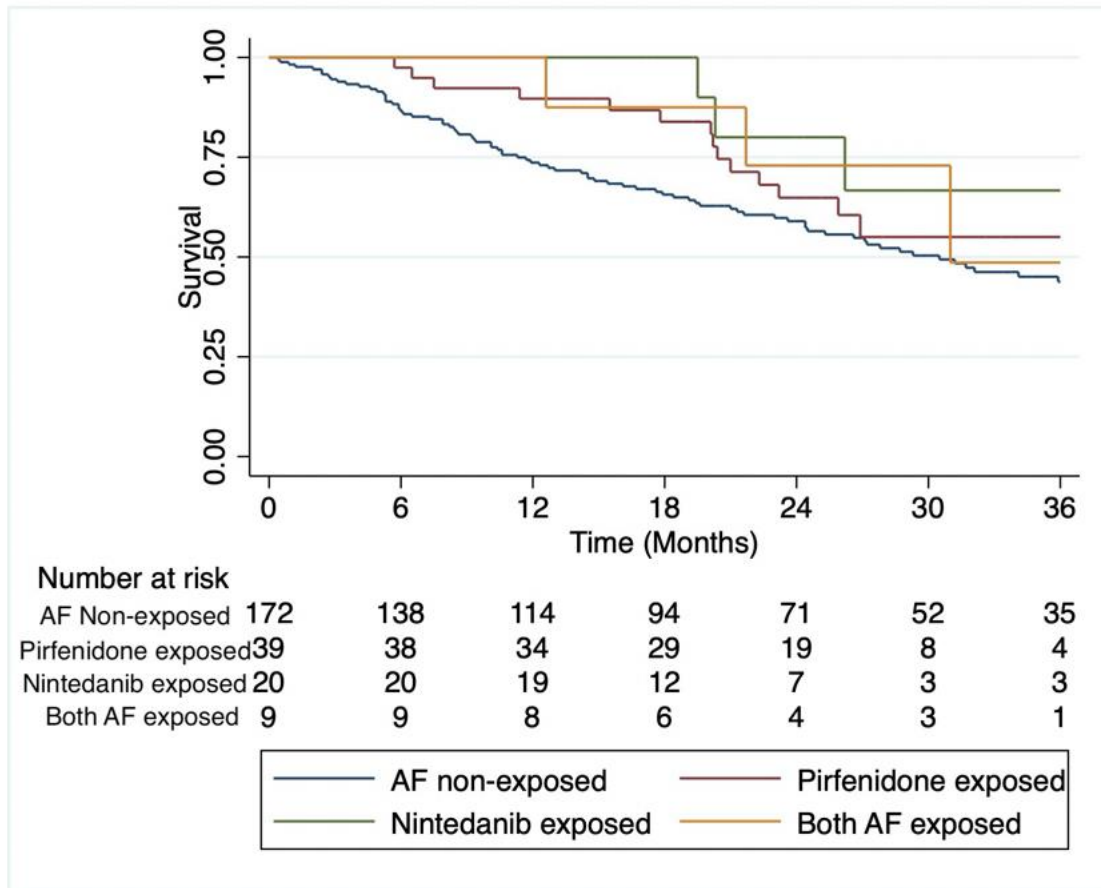

**e-Figure 2.** Survival among individual AF exposure groups

**e-Table 1.** Propensity matched covariate means, variance and variance ratios

| Covariate       | AF Exposed |          | AF Non-exposed |          | variance ratio |
|-----------------|------------|----------|----------------|----------|----------------|
|                 | mean       | variance | mean           | variance |                |
| white race      | 0.89       | 0.1      | 0.91           | 0.08     | 1.23           |
| gap score       | 4.11       | 1.76     | 4.09           | 1.63     | 1.08           |
| center          | 1.74       | 0.2      | 1.34           | 0.23     | 0.87           |
| smoking history | 0.69       | 0.22     | 0.59           | 0.24     | 0.9            |

**R-idx bias = 0**

**e-Table 2. Multivariable Adjusted Biomarker Survival Association Stratified by Anti-fibrotic Exposure**

| Biomarker | AF Non-exposed (n=172) |       |           | AF Exposed (n=68) |       |            |
|-----------|------------------------|-------|-----------|-------------------|-------|------------|
|           | Optimal threshold      | HR    | 95% CI    | Optimal threshold | HR    | 95% CI     |
| CA-125    | 225 pg/mL              | 1.18  | 0.42-3.32 | 100 pg/mL         | 6.63# | 1.6-27.5   |
| CXCL13    | 140 pg/mL              | 1.45  | 0.92-2.27 | 209 pg/mL         | 3.09  | 0.89-10.67 |
| MMP7      | 3.4 ng/mL              | 1.25  | 0.78-2.01 | 5.1 ng/mL         | 3.45* | 1.29-9.22  |
| SP-D      | 30 ng/mL               | 1.89  | 0.97-3.66 | 33 ng/mL          | 3.0*  | 1.01-8.91  |
| YKL-40    | 85 ng/mL               | 1.17  | 0.72-1.91 | 101 ng/mL         | 4.28# | 1.59-11.53 |
| VCAM-1    | 1600 ng/mL             | 2.30# | 1.31-4.03 | 1520 ng/mL        | 2.1   | 0.48-9.21  |
| OPN       | 47 ng/mL               | 1.42  | 0.86-2.36 | 58 ng/mL          | 5.56* | 1.39-23.2  |

∫ model adjusted for center, race, smoking history and baseline GAP score

\*  $p \leq 0.05$

#  $p \leq 0.01$

**e-Table 3. Biomarker Survival Association Stratified by Anti-fibrotic Exposure Using Non-Censored Follow-up Times**

| Biomarker | AF Non-exposed (n=172) |       |           | AF Exposed (n=68) |       |            |
|-----------|------------------------|-------|-----------|-------------------|-------|------------|
|           | Optimal threshold      | HR    | 95% CI    | Optimal threshold | HR    | 95% CI     |
| CA-125    | 225 pg/mL              | 2.42  | 0.98-5.99 | 100 pg/mL         | 4.27* | 1.23-14.8  |
| CXCL13    | 140 pg/mL              | 1.49* | 1.0-2.23  | 209 pg/mL         | 3.48* | 1.25-9.66  |
| MMP7      | 3.4 ng/mL              | 1.8#  | 1.2-2.69  | 5.1 ng/mL         | 3.87# | 1.58-9.47  |
| SP-D      | 30 ng/mL               | 2.36# | 1.41-3.96 | 33 ng/mL          | 2.04  | 0.83-4.99  |
| YKL-40    | 85 ng/mL               | 1.65* | 1.07-2.55 | 101 ng/mL         | 4.9#  | 2.01-11.96 |
| VCAM-1    | 1600 ng/mL             | 2.04# | 1.22-3.42 | 1520 ng/mL        | 2.81  | 0.82-9.65  |
| OPN       | 47 ng/mL               | 1.66* | 1.03-2.67 | 58 ng/mL          | 3.37* | 1.11-10.2  |

\*  $p \leq 0.05$

#  $p \leq 0.01$
